# Supplementary material
Source: Research Square preprint supplement (doi:10.21203/rs.3.rs-8519496/v1)
Supplement: Supplementary file 1 [file 2dfa4cc4cfaef0dfca095097.docx]

**Supplementary Material**

**Fe/Cu Bimetallic Particles for TCAL Dechlorination: From Parameter Effects to Reusable Catalysis with Mechanistic Insights**

# **Text S1**. Dchlorination rate calculation

The calculation for dchlorination rate η can be obtained the following Equation 1.

|  | (1) |
| --- | --- |

Where：

*η* is the dechlorination rate of trichloroacetaldehyde,

*C*l0 is the initial concentration of chloride ions,

*C*lt is the concentration of chloride ions at time t,

TCA is the initial concentration of trichloroacetaldehyde.

# Text S2. the reaction of TCAL in the Fe/Cu bimetallic system can be obtained the following Equation 2-8.

|  | (2) |
| --- | --- |
|  | (3) |
|  | (4) |
|  | (5) |
|  | (6) |
|  | (7) |
|  | (8) |

# Table S1. Kinetic fitting results of Fe/Cu to TCAL removal process

| Number of uses | Reaction rate equation | k (h-1) | R2 |
| --- | --- | --- | --- |
| 1 | -ln(Ct/C0)=0.1096t+1.6244 | 0.1096 | 0.9474 |
| 2 | -ln(Ct/C0)= 0.1092t+1.6244 | 0.1092 | 0.9652 |
| 3 | -ln(Ct/C0)= 0.099t+1.6244 | 0.099 | 0.9591 |
| 4 | -ln(Ct/C0)= 0.0951t+1.6244 | 0.0951 | 0.9604 |
| 5 | -ln(Ct/C0)= 0.0963t+1.6244 | 0.0963 | 0.9651 |

# Table S2. Kinetic fitting results of ZVI to TCAL removal

| Number of uses | Reaction rate equation | k (h-1) | R2 |
| --- | --- | --- | --- |
| 1 | -ln(Ct/C0)= 0.0537t+1.6244 | 0.0537 | 0.9355 |
| 2 | -ln(Ct/C0)= 0.0482t+1.6244 | 0.0482 | 0.9612 |
| 3 | -ln(Ct/C0)= 0.0419t+1.6244 | 0.0419 | 0.9551 |
| 4 | -ln(Ct/C0)= 0.0364t+1.6244 | 0.0364 | 0.978 |
| 5 | -ln(Ct/C0)= 0.0352t+1.6244 | 0.0352 | 0.9341 |


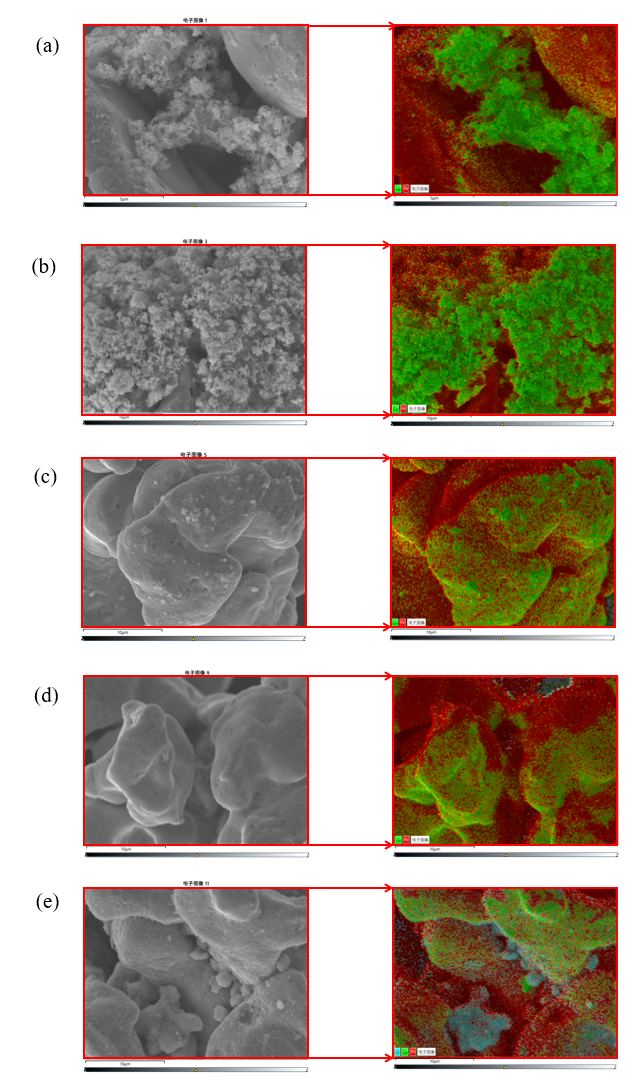


# Fig. S1. Original, full-frame SEM images corresponding to Figure 2. (a) Original for Fig. 2a, (b) Original for Fig. 2b, (c) Original for Fig. 2c, (d) Original for Fig. 2d, (e) Original for Fig. 2e.


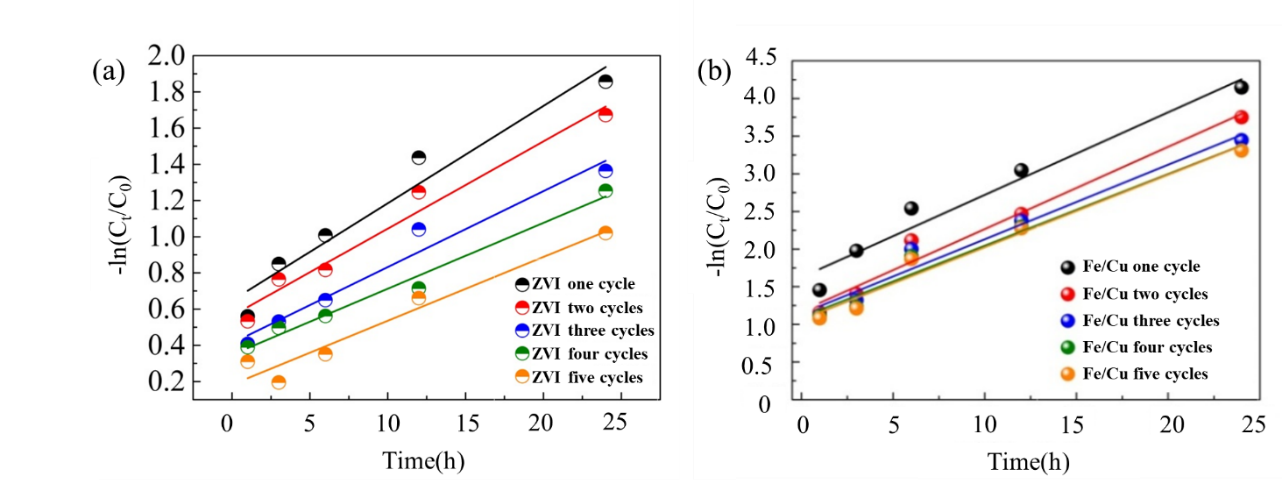


# Fig. S2. Kinetic fitting of TCAL removal process during ZVI (a) and Fe/Cu (b) reuse


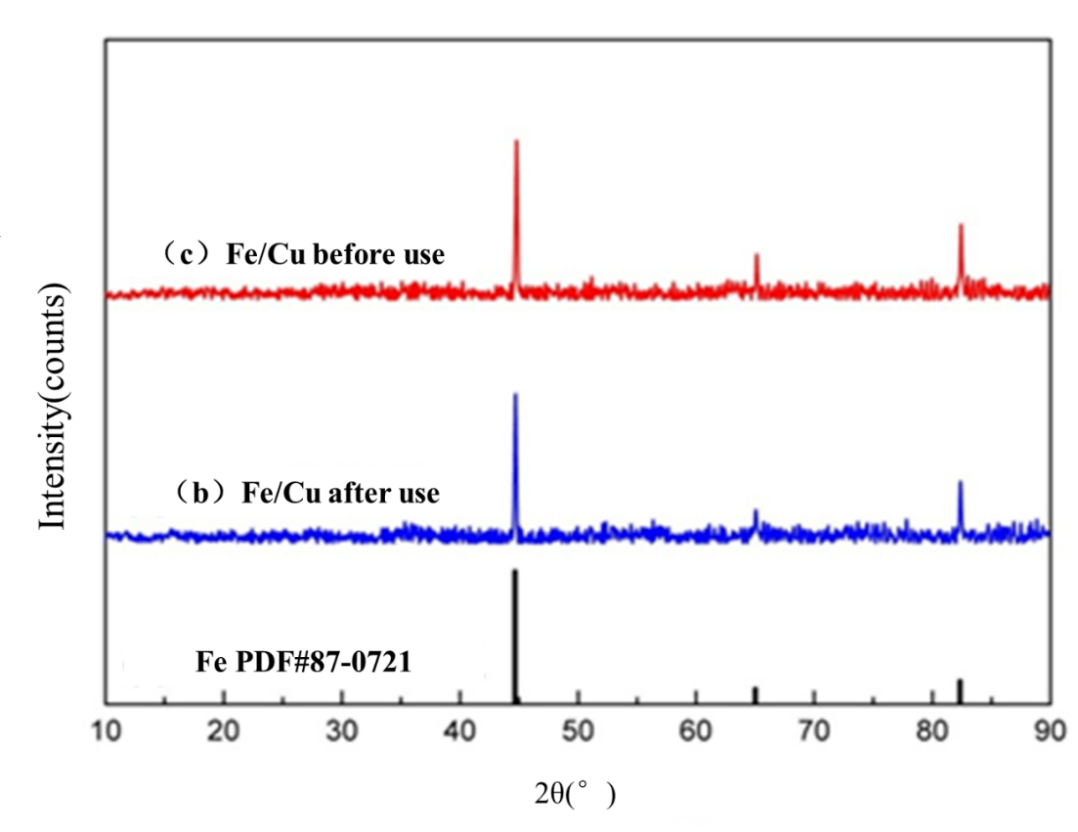


# Fig. S3. XRD pattern of Fe/Cu before and after reaction
